# Supplementary material for: Fast proton transport enables the magnetic relaxation response of graphene quantum dots for monitoring the oxidative environment in vivo
Source: Royal Society of Chemistry journal article supplement (doi:10.1039/d3nr05053j), 2023-12-27
Supplement: d3nr05053j1.pdf [file d3nr05053j1.pdf]

## Electronic Supplementary Information (ESI)

### Fast proton transport enables magnetic relaxation response of graphene quantum dots for monitoring oxidative environment *in vivo*

Yongqiang Li,<sup>a,†</sup> Hang Wang,<sup>a,b,†</sup> Caichao Ye,<sup>c</sup> Xuelian Wang,<sup>d</sup> Peng He,<sup>a,b</sup> Siwei Yang,<sup>a,b,\*</sup> Hui Dong,<sup>a,b,\*</sup> and Guqiao Ding<sup>a,b,\*</sup>

<sup>a</sup> State Key Laboratory of Materials for Integrated Circuits, Shanghai Institute of Microsystem and Information Technology (SIMIT), Chinese Academy of Sciences (CAS), Shanghai 200050, People's Republic of China. E-mails: yangsiwei@mail.sim.ac.cn; donghui@mail.sim.ac.cn; gqding@mail.sim.ac.cn

<sup>b</sup> Center of Materials Science and Optoelectronics Engineering, University of Chinese Academy of Sciences (UCAS), Beijing 100049, People's Republic of China.

<sup>c</sup> Academy for Advanced Interdisciplinary Studies & Department of Materials Science and Engineering, Guangdong Provincial Key Laboratory of Computational Science and Material Design, Southern University of Science and Technology, Shenzhen, Guangdong 518055, People's Republic of China.

<sup>d</sup> Department of Cardiology, Ruijin Hospital, Shanghai Jiaotong University School of Medicine, Shanghai 200025, People's Republic of China.

<sup>†</sup> These authors contributed equally to this work.

### Supplementary experimental section

#### Materials

L-cysteine hydrochloride, diethylene glycol (PEG<sub>2</sub>, 99.5%), triethylene glycol (PEG<sub>3</sub>, 99.0%), tetraethylene glycol (PEG<sub>4</sub>, 99.0%), pentaethylene glycol (PEG<sub>5</sub>, 98.0%), hexaethylene glycol (PEG<sub>6</sub>, 97.0%), heptaethylene glycol (PEG<sub>7</sub>, 95%), octaethylene glycol (PEG<sub>8</sub>, 98.0%), and gadolinium trinitrate (98%) were purchased from Aladdin Co., Ltd. (Shanghai, China) and used without further purification. Alumina inorganic membrane (220 nm) and dialysis bags (3500 Da) were purchased from CASYUEDA Materials Technology Co., Ltd. (Shanghai, China). Deionized (DI) water (resistivity ~18.2 MΩ cm at 25 °C) was obtained using a Milli-Q system and used throughout all the experiments.

#### Apparatus

The transmission electron microscopy (TEM) images were captured using JEM-ARM300F (JEOL Ltd.) with a voltage of 80 kV. The X-ray photoelectron spectra (XPS) were obtained using Escalab 250Xi (Thermo Fisher Scientific Inc.). An inductively coupled plasma-optical emission spectrometer (ICP-OES, ICPOES730, Agilent Technologies, Inc.) was used to quantify the Gd<sup>3+</sup> concentrations. Atomic force microscopy (AFM) experiments were carried out using a Bruker Dimension Icon system. Photoluminescence emission and excitation spectra were recorded in aqueous solution using a PerkinElmer LS55 luminescence spectrometer (PerkinElmer Instruments, U.K.) at room temperature (25 °C). The lifetimes were measured in aqueous solution using Edinburgh FLS1000 (excitation source: picosecond pulsed light emitting diode with wavelength of 320 nm) at room temperature (25 °C).

#### *In vivo* MRI

The *in vivo* magnetic resonance imaging (MRI) of the rat was conducted using a Bruker Clinscan 7.0 T MRI scanner with the following parameters:

Echo time = 3 ms, Repetition time = 1000 ms, Number of phase encoding steps = 90, Number of averages = 2, Field of View = 70 mm × 70 mm, Slice thickness = 1.2 mm, Images in acquisition = 25, Spacing between slices = 1.5 mm.

The rat was anesthetized by isoflurane and then laid face down on the sample plane before the scanning. All animal experiments were conducted in accordance with protocols approved by the Ethics Committee of Ruijin Hospital affiliated to Shanghai Jiao Tong University School of Medicine.

## Supplementary figures

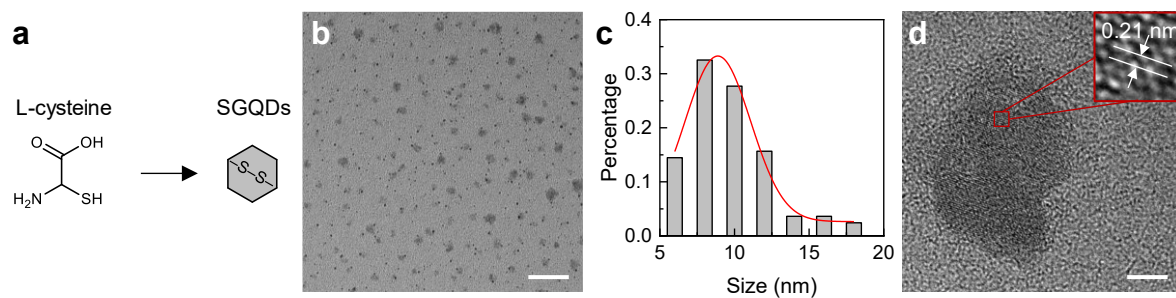

**Fig. S1** Morphological characterizations of SGQDs. (a) Synthesis of SGQDs using hydrothermal treatment. The regular hexagons fill in grey represent the SGQDs. 100 mg of L-cysteine hydrochloride is dissolved in 100 mL of DI water for hydrothermal reaction (150 °C, 12 h). (b) The TEM image of SGQDs. Scale bar: 100 nm. (c) The size distribution histogram acquired from Fig. S1a. The *Sturges'* method was used to plot the particle size histogram by counting 83 particles. A Gaussian distribution was used to obtain the average size of SGQDs (8.89 nm). (d) The high-resolution TEM of SGQDs. Scale bar: 5 nm. Inset: the lattice spacing of SGQDs is 0.21 nm, corresponding to the [1120] lattice fringes of graphene.

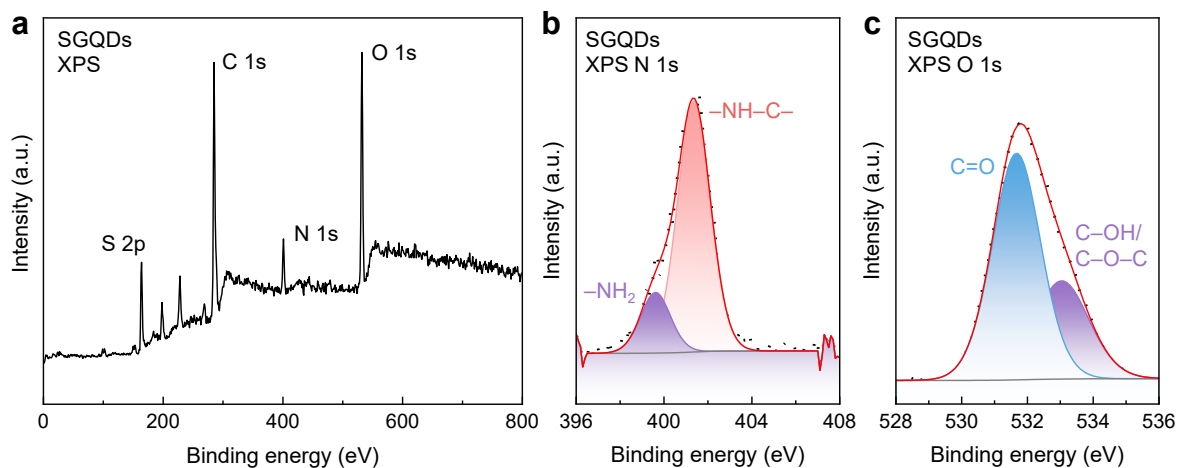

**Fig. S2** Structure characterizations of SGQDs. (a) The XPS spectrum of SGQDs. Peaks located at 284.91, 401.32, 531.87, and 163.61 eV can be recognized as the C 1s, N 1s, O 1s, and S 2p signals of SGQDs, respectively. The atomic contents of C, N, O, and S in SGQDs are 60.96, 8.09, 21.13, and 9.82 at.%, respectively. Data acquired from the combustion elemental analyzer also confirms the contents of C, N, O, and S are 56.31, 9.53, 20.34, and 13.82 at.%, which are equivalent to the XPS results. (b) The XPS N 1s spectrum of SGQDs. The two peaks around 399.64 and 401.38 eV can be recognized as  $-\text{NH}_2$  and  $-\text{NH}-\text{C}-$  bonds, respectively. (c) The XPS O 1s spectrum of SGQDs. peaks at 531.67 and 533.04 eV contribute to the  $\text{C}=\text{O}$  and  $\text{C}-\text{OH}/\text{C}-\text{O}-\text{C}$  bonds, respectively.

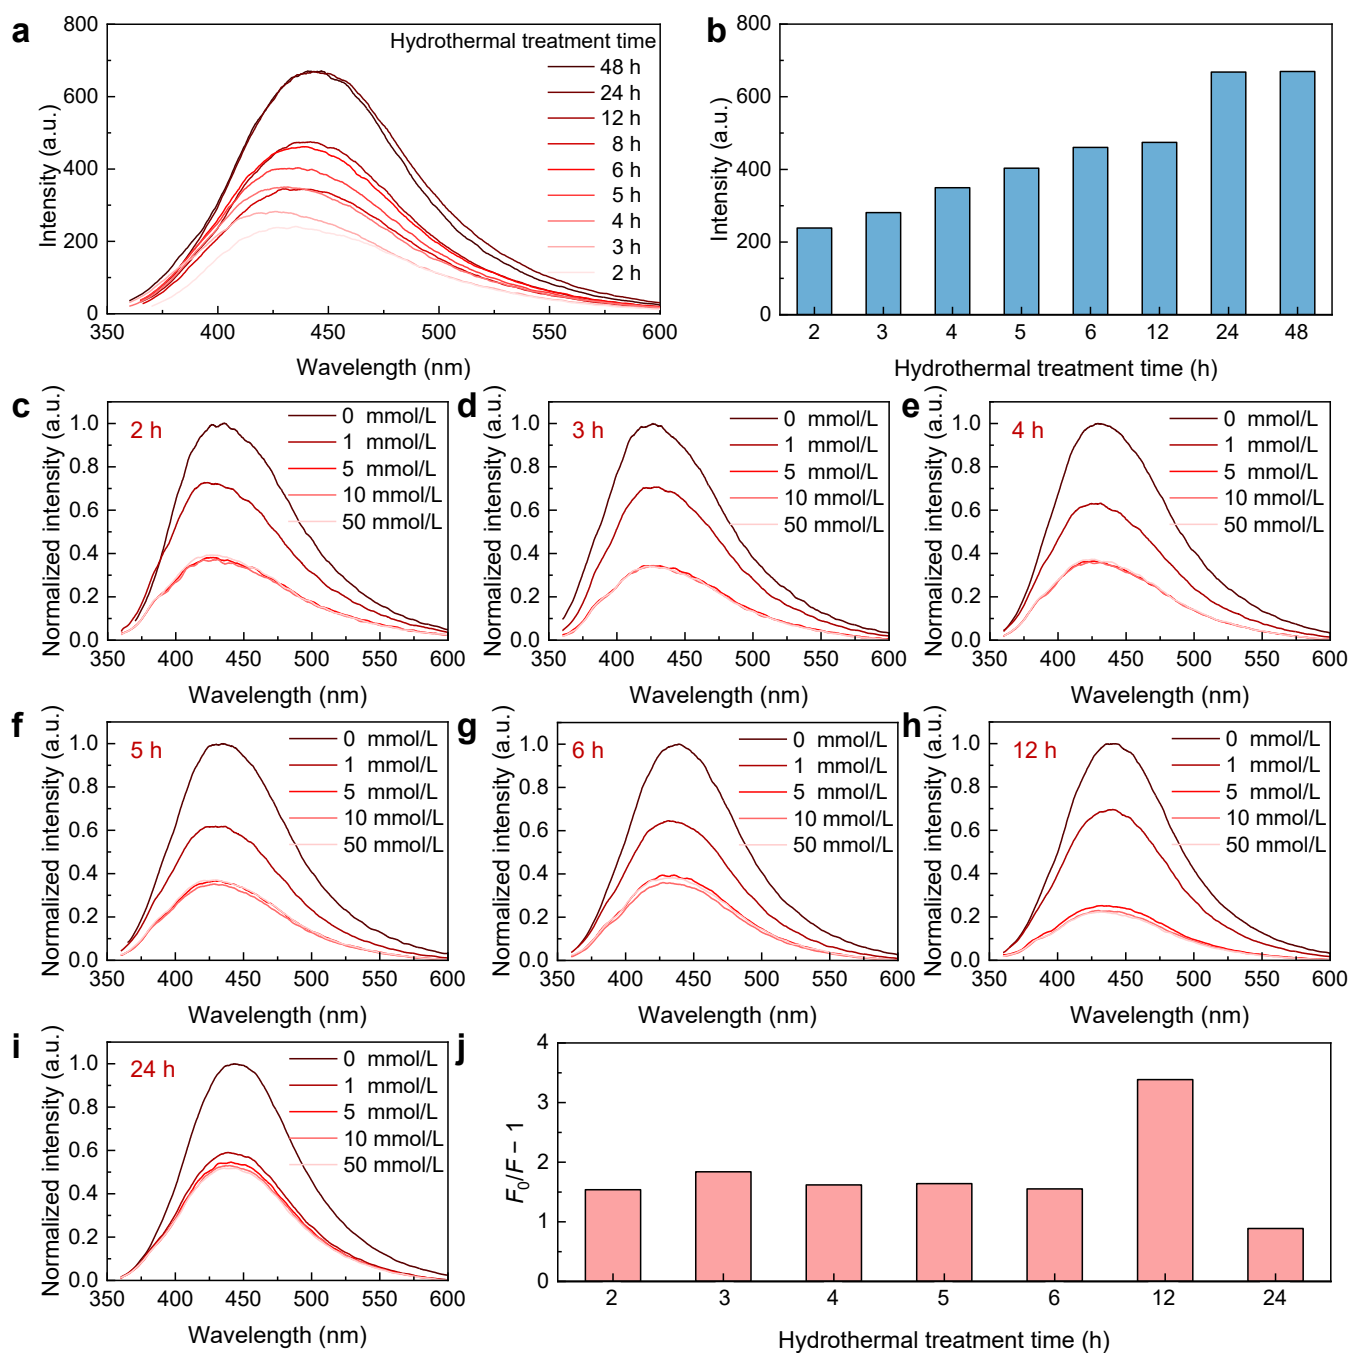

**Fig. S3** Optimization of hydrothermal treatment time for synthesizing SGQDs. (a) The fluorescence emission spectra and (b) comparison of fluorescent intensity of SGQDs synthesized with different hydrothermal treatment times. The fluorescent emission intensity increases with the increasing hydrothermal treatment time. (c)–(i) The fluorescence emission spectra (data was smoothed, normalized fluorescent intensities) of SGQDs after reacting with  $\text{H}_2\text{O}_2$  with different concentrations for 12 h. 0 mmol/L of  $\text{H}_2\text{O}_2$  represents the blank test. The SGQDs used are synthesized by the hydrothermal treatment for (c) 2 h, (d) 3 h, (e) 4 h, (f) 5 h, (g) 6 h, (h) 12 h, and (i) 24 h. (j) Comparison of the fluorescent intensity change of SGQDs synthesized with different hydrothermal treatment times.  $F_0$  and  $F$  represent the fluorescent intensities of SGQDs before and after the reaction with  $\text{H}_2\text{O}_2$  (50 mmol/L), respectively. The SGQDs synthesized *via* hydrothermal treatment for 12 h show the largest change after reaction with  $\text{H}_2\text{O}_2$ , the SGQDs (12 h) are therefore used in the following experiments.

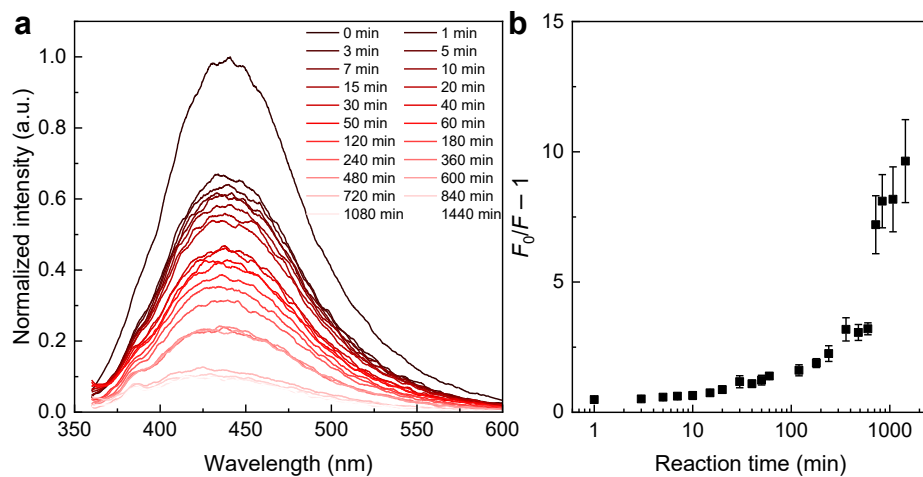

**Fig. S4** Optimization of reaction between SGQDs and H<sub>2</sub>O<sub>2</sub>. (a) The fluorescence emission spectra and (b) comparison of fluorescent intensity of SGQDs after the reaction with H<sub>2</sub>O<sub>2</sub> (50 mmol/L) for different times.  $F_0$  and  $F$  represent the fluorescent intensities of SGQDs before and after the reaction with H<sub>2</sub>O<sub>2</sub>, respectively. The fluorescent intensity of SGQDs is reduced as the reaction time increases.

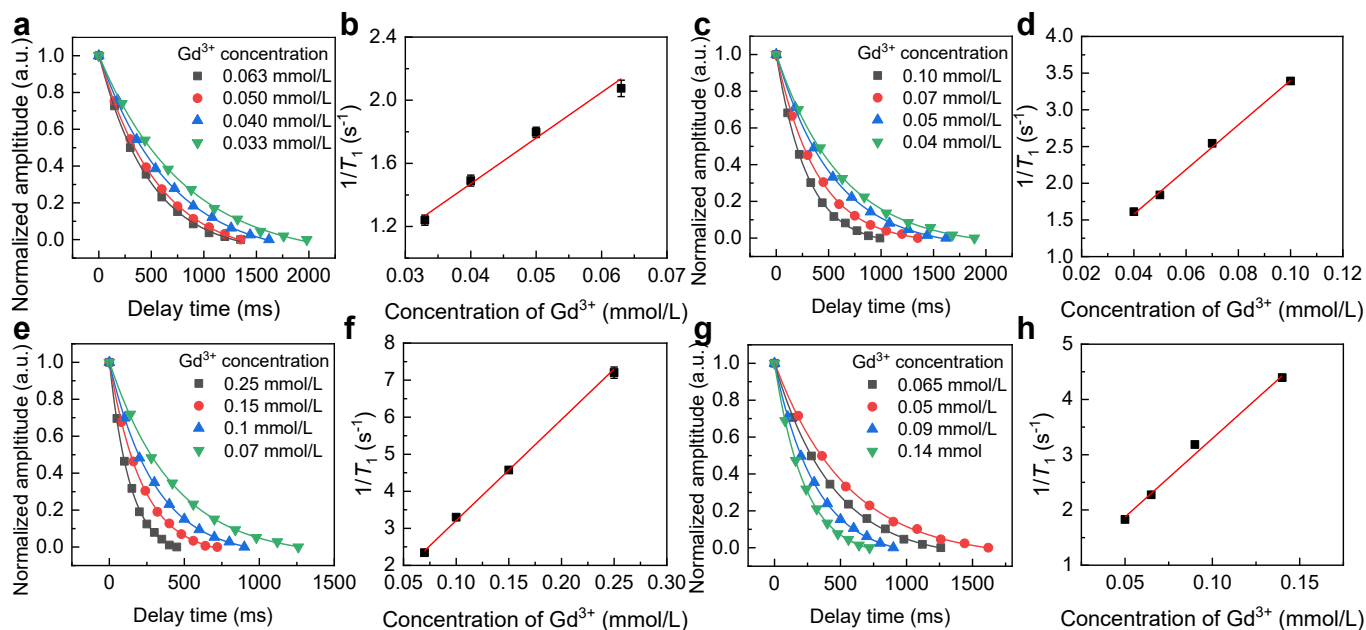

**Fig. S5** Optimization of the ratio of L-cysteine hydrochloride to  $\text{Gd}^{3+}$  for synthesizing SGQDS-Gd. The (a)  $T_1$  fittings and (b) longitudinal relaxivity ( $r_1$ ) fittings of SGQDS-Gd. 100 mg of L-cysteine hydrochloride and 0.5 mmol/L of  $\text{Gd}^{3+}$  were dissolved in 100 mL of DI water for hydrothermal reaction (150 °C, 12 h) to obtain the SGQDS-Gd. The  $T_1$  values of SGQDS-Gd aqueous solution are  $481.87 \pm 13.00$ ,  $556.63 \pm 10.99$ ,  $670.78 \pm 16.82$ , and  $806.33 \pm 22.85$  ms when the  $\text{Gd}^{3+}$  concentrations are 0.063, 0.05, 0.04, and 0.03 mmol/L with the adjusted  $R^2$  values of 0.99934, 0.99971, 0.99953, and 0.99938, respectively. The  $r_1$  of SGQDS-Gd aqueous solution is fitted as  $28.92 \pm 2.50$  L mmol $^{-1}$  s $^{-1}$  with an adjusted  $R^2$  of 0.97789. The (c)  $T_1$  fittings and (d)  $r_1$  fittings of SGQDS-Gd. 100 mg of L-cysteine hydrochloride and 1 mmol/L of  $\text{Gd}^{3+}$  were dissolved in 100 mL of DI water for hydrothermal reaction (150 °C, 12 h) to obtain the SGQDS-Gd. The  $T_1$  values of SGQDS-Gd aqueous solution are  $294.77 \pm 4.19$ ,  $393.18 \pm 6.60$ ,  $543.50 \pm 7.42$ ,  $620.38 \pm 11.96$  ms when the  $\text{Gd}^{3+}$  concentrations are 0.10, 0.07, 0.05, and 0.04 mmol/L with the adjusted  $R^2$  values of 0.99977, 0.99968, 0.99979, and 0.99962, respectively. The  $r_1$  of SGQDS-Gd aqueous solution is fitted as  $30.41 \pm 1.44$  L mmol $^{-1}$  s $^{-1}$  with an adjusted  $R^2$  of 0.99330. The (e)  $T_1$  fittings and (f)  $r_1$  fittings of SGQDS-Gd. 100 mg of L-cysteine hydrochloride and 5 mmol/L of  $\text{Gd}^{3+}$  were dissolved in 100 mL of DI water for hydrothermal reaction (150 °C, 12 h) to obtain the SGQDS-Gd. The  $T_1$  values of SGQDS-Gd aqueous solution are  $138.83 \pm 3.94$ ,  $218.64 \pm 3.31$ ,  $303.12 \pm 5.7$ , and  $427.17 \pm 9.71$  ms when the  $\text{Gd}^{3+}$  concentrations are 0.25, 0.15, 0.10, and 0.01 mmol/L with the adjusted  $R^2$  values of 0.99944, 0.99975, 0.99965, and 0.99950, respectively. The  $r_1$  of SGQDS-Gd aqueous solution is fitted as  $27.26 \pm 1.01$  L mmol $^{-1}$  s $^{-1}$  with an adjusted  $R^2$  of 0.99592. The (g)  $T_1$  fittings and (h)  $r_1$  fittings of SGQDS-Gd. 100 mg of L-cysteine hydrochloride and 10 mmol/L of  $\text{Gd}^{3+}$  were dissolved in 100 mL of DI water for hydrothermal reaction (150 °C, 12 h) to obtain the SGQDS-Gd. The  $T_1$  values of SGQDS-Gd aqueous solution are  $227.52 \pm 1.67$ ,  $314.17 \pm 4.61$ ,  $439.63 \pm 6.51$ , and  $547.48 \pm 12.78$  ms when the  $\text{Gd}^{3+}$  concentrations are 0.14, 0.09, 0.065, and 0.05 mmol/L with the adjusted  $R^2$  values of 0.99947, 0.99979, 0.99980, and 0.99994, respectively. The  $r_1$  of SGQDS-Gd aqueous solution is fitted as  $28.38 \pm 1.48$  L mmol $^{-1}$  s $^{-1}$  with an adjusted  $R^2$  of 0.99192. Based on the above results, the optimal ratio of L-cysteine hydrochloride to  $\text{Gd}^{3+}$  for synthesizing SGQDS-Gd is 100 mg to 1 mmol/L when dissolved in 100 mL of DI water.

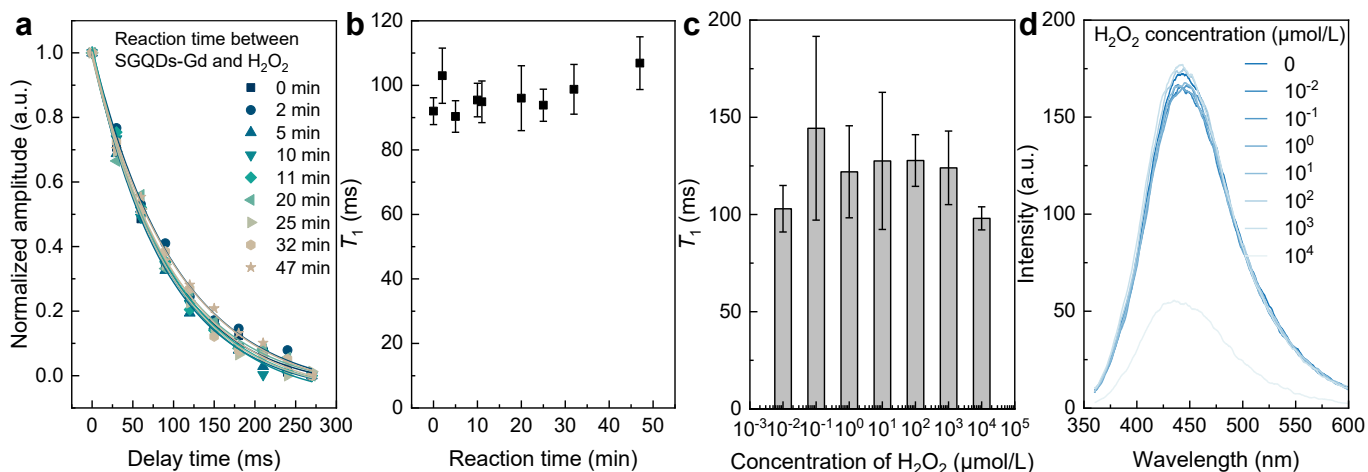

**Fig. S6** Detection of H<sub>2</sub>O<sub>2</sub> using SGQDs-Gd (0.2 mmol/L). (a)  $T_1$  fittings of SGQDs-Gd before and after reaction with H<sub>2</sub>O<sub>2</sub> (50 mmol/L) for different times.  $T_1$  values SGQDs-Gd aqueous solution are  $92.01 \pm 4.50$ , and  $102.98 \pm 9.26$ ,  $90.36 \pm 5.28$ ,  $95.45 \pm 5.62$ ,  $94.90 \pm 6.96$ ,  $96.02 \pm 10.86$ ,  $93.83 \pm 5.39$ ,  $98.78 \pm 8.33$ , and  $106.88 \pm 8.82$  ms when the reaction times between SGQDs-Gd and H<sub>2</sub>O<sub>2</sub> are 0, 2, 5, 10, 11, 20, 25, 32, and 47 min, respectively. A scatter diagram in (b) reveals the  $T_1$  of SGQDs-Gd has no significant change when reacting with H<sub>2</sub>O<sub>2</sub>. Error bars indicate the error of fitting. (c) The  $T_1$  values of SGQDs-Gd when reacting with H<sub>2</sub>O<sub>2</sub> (different concentrations) after 12 h. When the H<sub>2</sub>O<sub>2</sub> concentration is 0 (blank), the  $T_1$  of SGQDs-Gd is  $117.37 \pm 21.42$  ms. When increasing the H<sub>2</sub>O<sub>2</sub> concentration, the  $T_1$  doesn't show significant change compared to that of the blank sample. Error bars indicate the standard deviation (SD) of three replicates of the test. (d) The fluorescence emission spectra of SGQDs-Gd after reacting with H<sub>2</sub>O<sub>2</sub> for 12 h. The fluorescent intensity of SGQDs-Gd shows a significant reduction after reacting with H<sub>2</sub>O<sub>2</sub> (10 mmol/L) for 12 h, indicating the SGQDs in SGQDs-Gd still have the ability to sense H<sub>2</sub>O<sub>2</sub> after connecting with Gd<sup>3+</sup>.

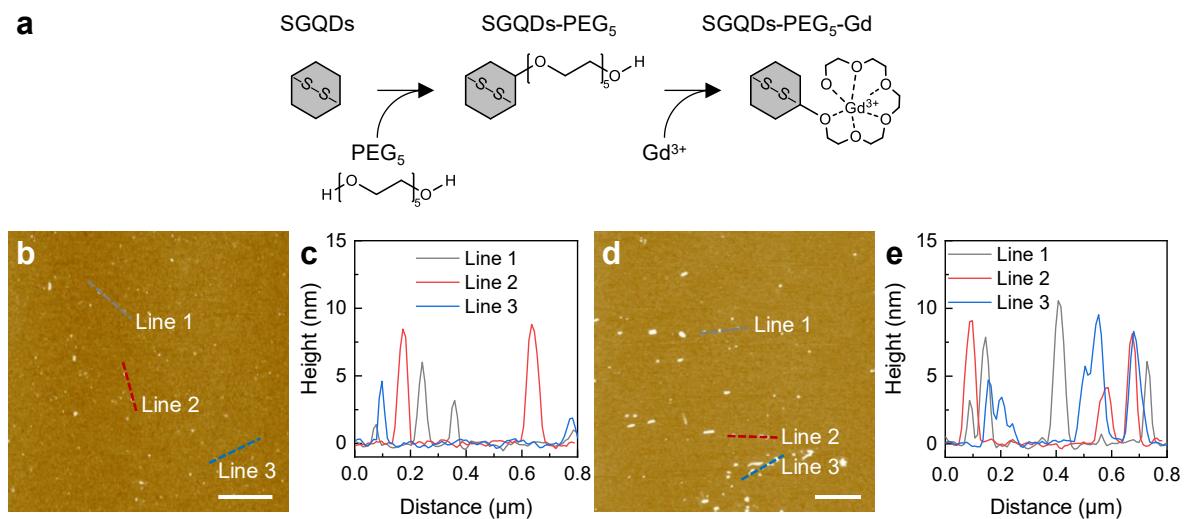

**Fig. S7** Synthesis of SGQDs-PEG<sub>5</sub>-Gd and the AFM characterizations. (a) Hydrothermal treatment for synthesizing SGQDs-PEG<sub>5</sub>-Gd. 0.1 mmol of PEG<sub>5</sub> was added into the prepared SGQDs (100 mL) and heated at 150 °C for 6 h. Next, 0.1 mmol Gd<sup>3+</sup> was added to the mixture and heated at 150 °C for another 6 h. PEG<sub>5</sub> can be replaced with other PEG chains for synthesizing SGQDs-PEG<sub>*n*</sub>-Gd. The purification of SGQDs-PEG<sub>*n*</sub>-Gd is the same as the purification of SGQDs. (b) The AFM image of SGQDs-PEG<sub>5</sub> distributed on a SiO<sub>2</sub>/Si substrate. Scale bar: 1 μm. (c) The height profiles of lines 1–3 marked in (b). The measured thickness of SGQDs-PEG<sub>5</sub> ranges from 2 to 9 nm, revealing that most SGQDs-PEG<sub>5</sub> nanoparticles contain 6 to 27 layers. (d) The AFM image of SGQDs-PEG<sub>5</sub>-Gd distributed on a SiO<sub>2</sub>/Si substrate. Scale bar: 1 μm. (e) The height profiles of lines 1–3 marked in (d). The measured thickness of SGQDs-PEG<sub>5</sub>-Gd ranges from 3 to 9 nm, revealing that most SGQDs-PEG<sub>5</sub>-Gd nanoparticles contain 10 to 27 layers. The SGQDs thicken after the modification of PEG<sub>5</sub> but keep the thickness after the binding of Gd<sup>3+</sup>.



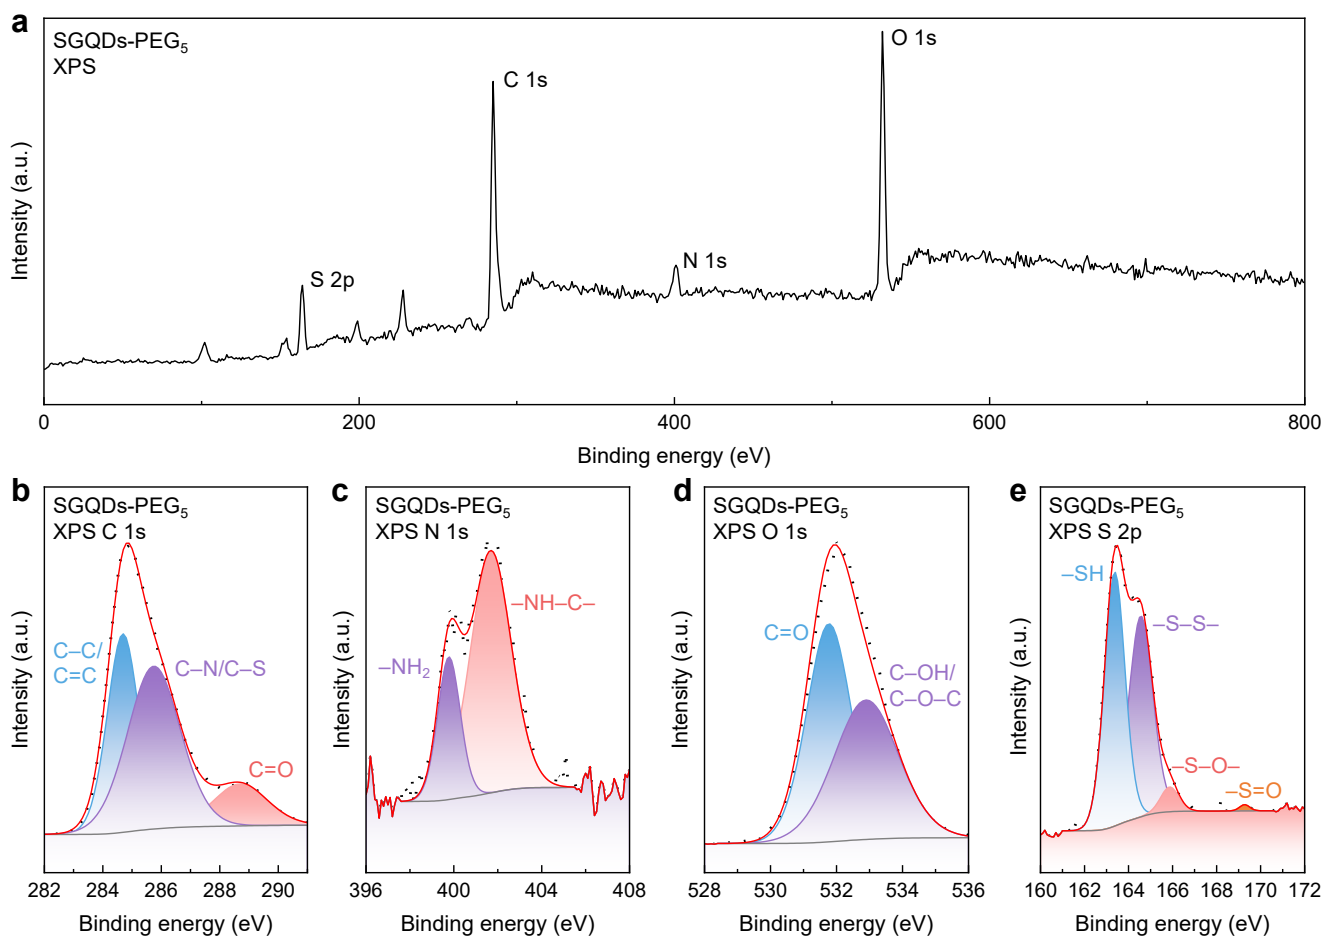

**Fig. S8** Structure characterizations of SGQDs-PEG<sub>5</sub>. (a) The XPS spectrum of SGQDs-PEG<sub>5</sub>. Peaks located at 284.94, 401.63, 532.09, and 163.63 eV can be recognized as the C 1s, N 1s, O 1s, and S 2p signals of SGQDs-PEG<sub>5</sub>, respectively. The atomic contents of C, N, O, and S in SGQDs-PEG<sub>5</sub> are 63.31, 5.99, 22.91, and 7.79 at.%, respectively. The increased proportions of C and O compared to those of SGQDs (Fig. S2a) indicate the introduction of PEG<sub>5</sub> in the structure. (b) XPS C 1s spectrum of SGQDs-PEG<sub>5</sub>. Peaks located at 284.69, 285.75, and 288.68 eV can be regarded as the C-C/C=C, C-N/C-S, and C=O bonds, respectively. (c) The XPS N 1s spectrum of SGQDs-PEG<sub>5</sub>. The two peaks around 399.76 and 401.69 eV can be recognized as -NH<sub>2</sub> and -NH-C- bonds, respectively. (d) XPS O 1s spectrum of SGQDs-PEG<sub>5</sub>. Peaks at 531.82 and 532.95 eV can be recognized as C=O and C-OH/C-O-C bonds, respectively. (e) XPS S 2p spectrum of SGQDs-PEG<sub>5</sub>. Peaks at 163.37, 164.53, 165.87, and 169.27 eV can be regarded as the -SH, -S-S-, -S-O-, and -S=O bonds, respectively.

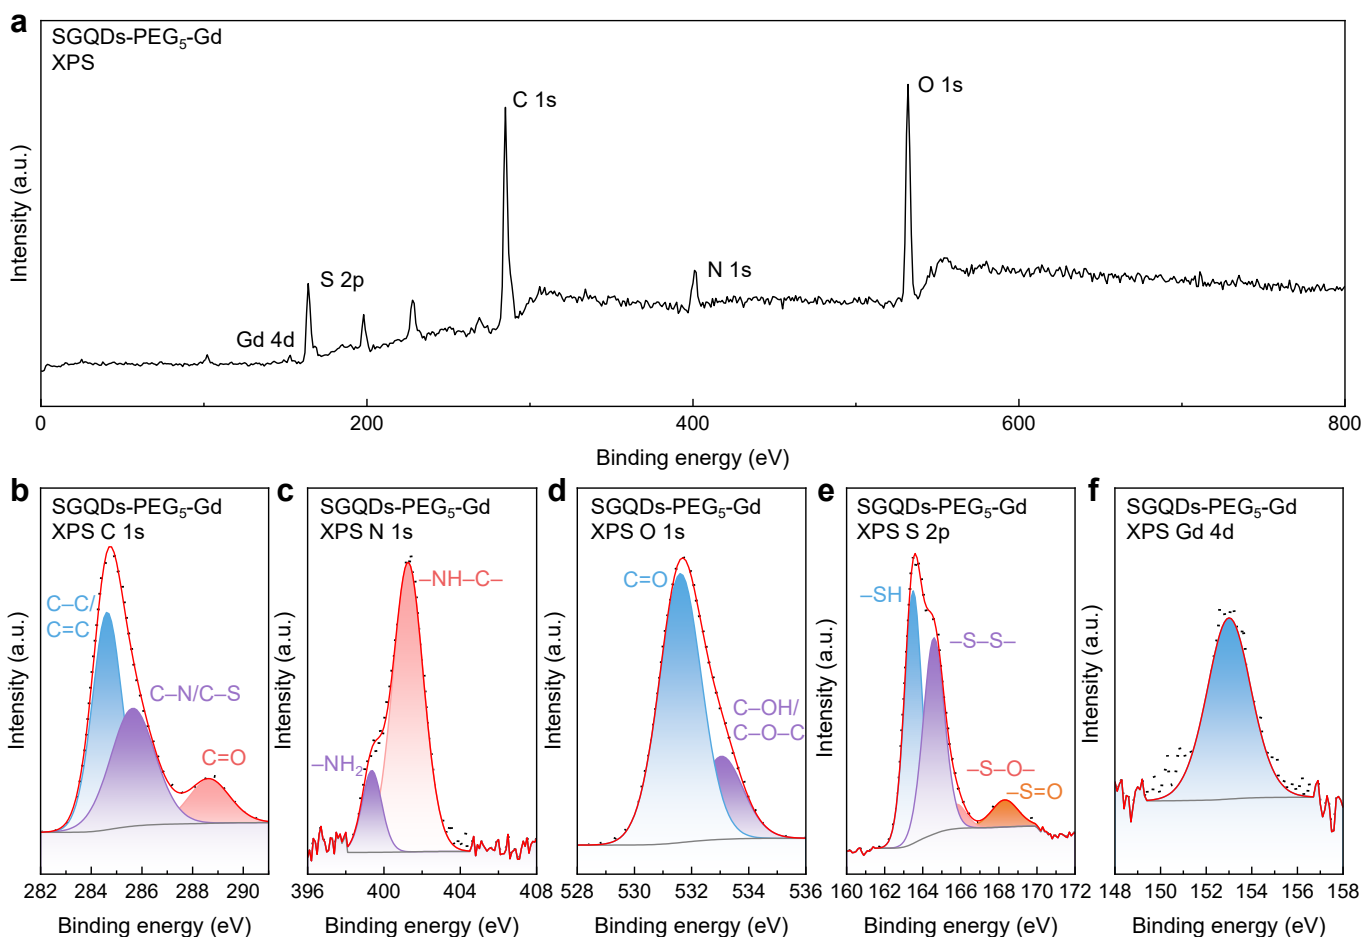

**Fig. S9** Structure characterizations of SGQDs-PEG<sub>5</sub>-Gd. (a) The XPS spectrum of SGQDs-PEG<sub>5</sub>-Gd. Peaks located at 284.79, 401.27, 531.71, 163.79, and 152.91 eV can be recognized as the C 1s, N 1s, O 1s, S 2p, and Gd 4d signals of SGQDs-PEG<sub>5</sub>-Gd, respectively. The atomic contents of C, N, O, S, and Gd in SGQDs-PEG<sub>5</sub>-Gd are 58.59, 8.43, 22.22, 10.51, and 0.25 at.%, respectively. (b) XPS C 1s spectrum of SGQDs-PEG<sub>5</sub>-Gd. Peaks located at 284.71, 285.81, and 288.71 eV can be regarded as the C-C/C=C, C-N/C-S, and C=O bonds, respectively. (c) The XPS N 1s spectrum of SGQDs-PEG<sub>5</sub>-Gd. The two peaks around 399.43 and 401.38 eV can be recognized as -NH<sub>2</sub> and -NH-C- bonds, respectively. (d) XPS O 1s spectrum of SGQDs-PEG<sub>5</sub>-Gd. Peaks at 531.66 and 533.10 eV can be recognized as C=O and C-OH/C-O-C bonds, respectively. (e) XPS S 2p spectrum of SGQDs-PEG<sub>5</sub>-Gd. Peaks at 163.36, 164.30, 164.94, and 168.77 eV can be regarded as the -SH, -S-S-, -S-O-, and -S=O bonds, respectively. (f) XPS Gd 4d spectrum of SGQDs-PEG<sub>5</sub>-Gd.

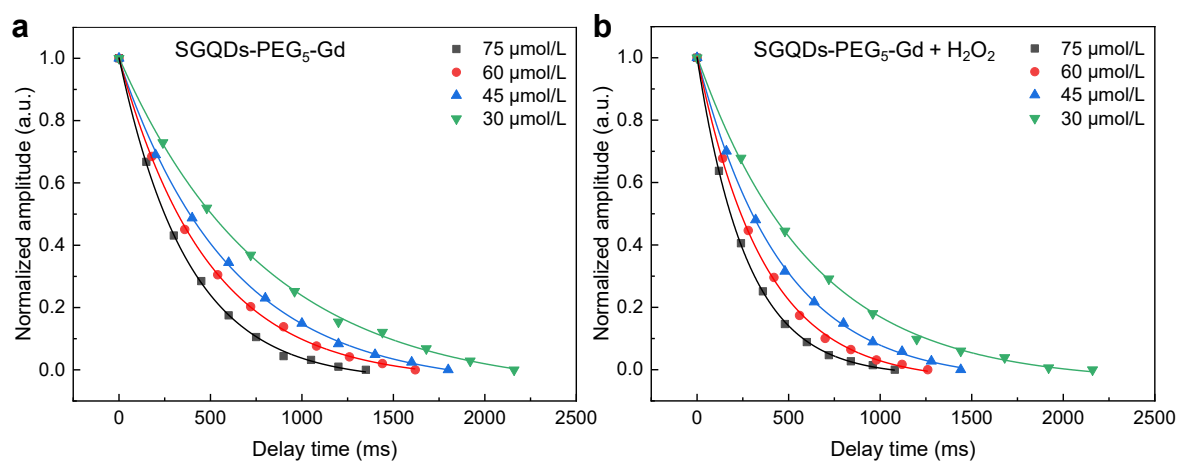

**Fig. S10**  $T_1$  fittings of SGQDs-PEG<sub>5</sub>-Gd. (a)  $T_1$  fittings of SGQDs-PEG<sub>5</sub>-Gd with different Gd<sup>3+</sup> concentrations. The  $T_1$  values are  $377.22 \pm 7.73$ ,  $486.23 \pm 7.73$ ,  $605.36 \pm 11.78$ , and  $799.47 \pm 21.74$  ms when the Gd<sup>3+</sup> concentrations are 75, 60, 45, and 30 μmol/L with adjusted  $R^2$  values of 0.99950, 0.99972, 0.99963, and 0.99936, respectively. (b)  $T_1$  fittings of SGQDs-PEG<sub>5</sub>-Gd after reacting with H<sub>2</sub>O<sub>2</sub> (10 mmol/L, 12 h) with different Gd<sup>3+</sup> concentrations. The  $T_1$  values are  $270.48 \pm 3.11$ ,  $360.86 \pm 8.32$ ,  $456.69 \pm 8.37$ , and  $620.67 \pm 13.71$  ms when the Gd<sup>3+</sup> concentrations are 75, 60, 45, and 30 μmol/L with adjusted  $R^2$  values of 0.99983, 0.99938, 0.99965, and 0.99943, respectively.

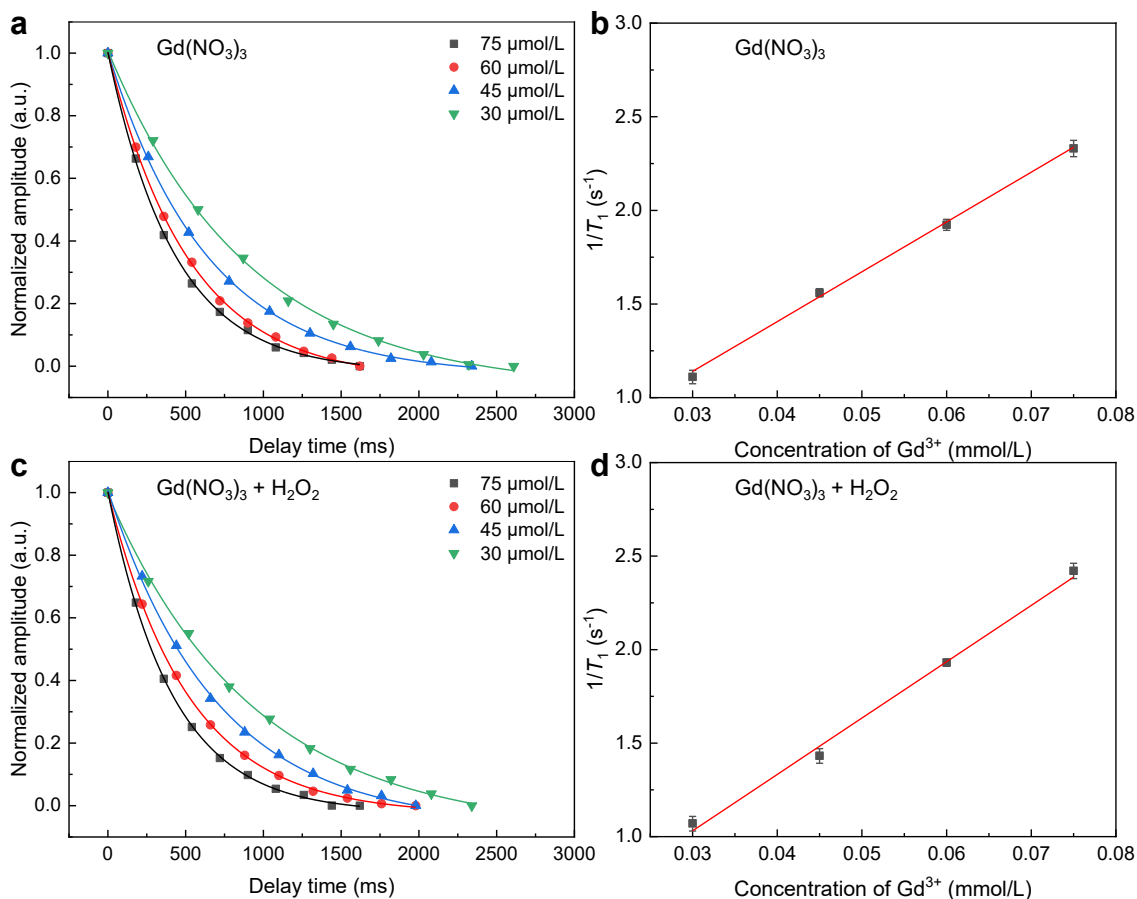

**Fig. S11** The  $T_1$  and  $r_1$  fittings of  $Gd(NO_3)_3$  aqueous solution. (a)  $T_1$  fittings of  $Gd(NO_3)_3$  aqueous solution with different  $Gd^{3+}$  concentrations. The  $T_1$  values are  $428.91 \pm 8.17$ ,  $520.15 \pm 8.47$ ,  $641.13 \pm 9.21$ , and  $900.05 \pm 29.09$  ms when the  $Gd^{3+}$  concentrations are 75, 60, 45, and 30  $\mu\text{mol/L}$  with adjusted  $R^2$  values of 0.99954, 0.99973, 0.99975, and 0.99901, respectively. (b) The  $r_1$  fitting of  $Gd(NO_3)_3$  aqueous solution. The  $r_1$  is fitted as  $26.60 \pm 1.07 \text{ L mmol}^{-1} \text{ s}^{-1}$  with an adjusted  $R^2$  of 0.99519. (c) The  $T_1$  fittings of  $Gd(NO_3)_3$  aqueous solution with different  $Gd^{3+}$  concentrations after reacting with 10 mmol/L of  $H_2O_2$  for 12 h. The  $T_1$  values are  $413.61 \pm 6.87$ ,  $517.72 \pm 5.12$ ,  $697.84 \pm 19.43$ , and  $934.33 \pm 34.13$  ms when the  $Gd^{3+}$  concentrations are 75, 60, 45, and 30  $\mu\text{mol/L}$  with adjusted  $R^2$  values of 0.99964, 0.99988, 0.99928, and 0.99895, respectively. (d) The  $r_1$  fittings of  $Gd(NO_3)_3$  aqueous solution after reacting with 10 mmol/L of  $H_2O_2$  for 12 h. The  $r_1$  is fitted as  $30.14 \pm 1.48 \text{ L mmol}^{-1} \text{ s}^{-1}$  with an adjusted  $R^2$  of 0.99276. The  $r_1$  values of  $Gd(NO_3)_3$  aqueous solution before and after the reaction with  $H_2O_2$  show a slight difference.

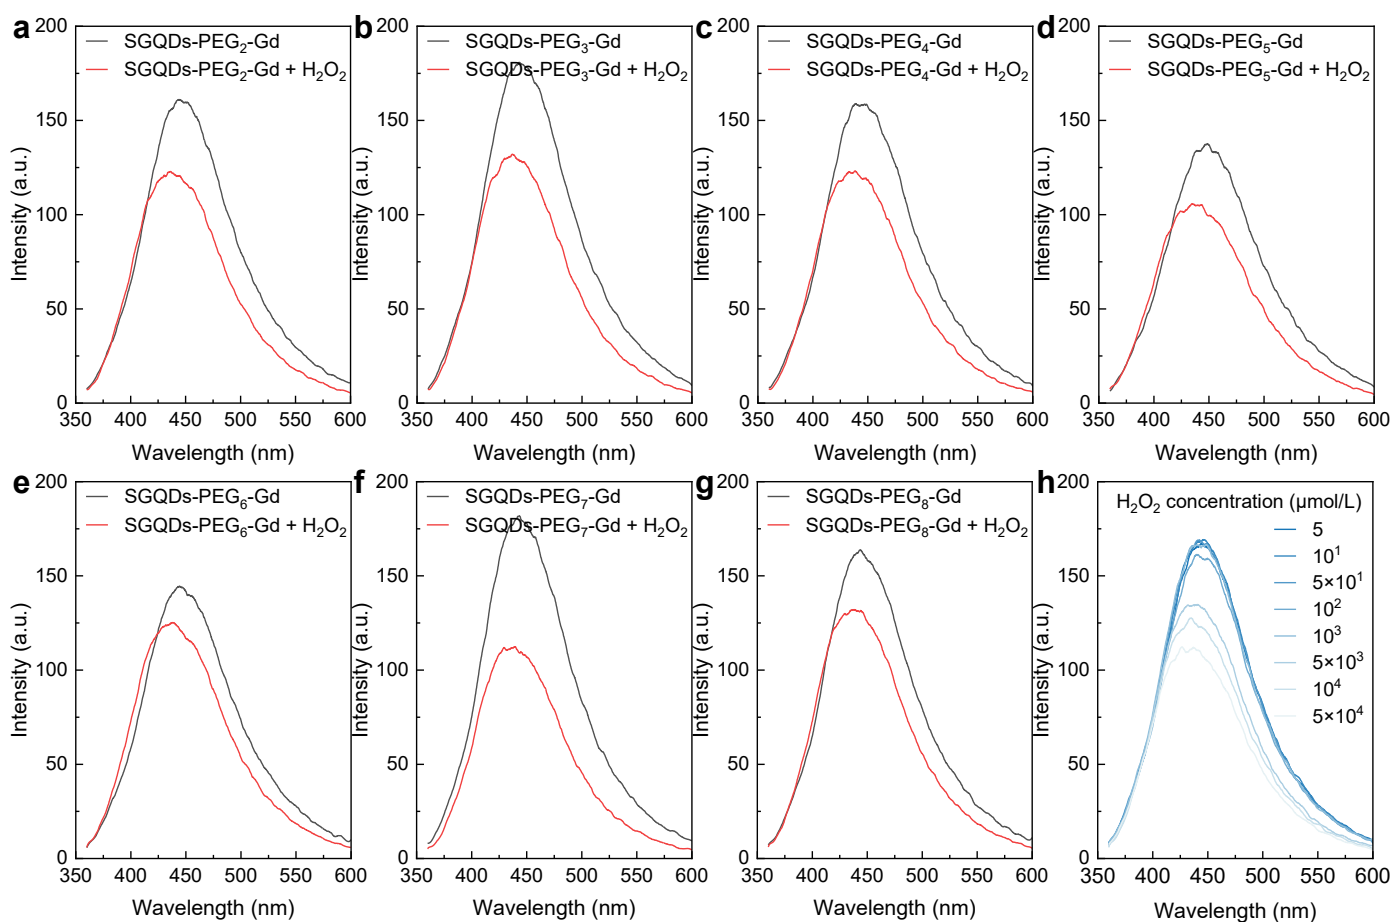

**Fig. S12** Fluorescence emission spectra of SGQDs-PEG<sub>*n*</sub>-Gd (*n* = 2–8) before and after reacting with H<sub>2</sub>O<sub>2</sub> for 12 h. The fluorescence emission spectra of (a) SGQDs-PEG<sub>2</sub>-Gd, (b) SGQDs-PEG<sub>3</sub>-Gd, (c) SGQDs-PEG<sub>4</sub>-Gd, (d) SGQDs-PEG<sub>5</sub>-Gd, (e) SGQDs-PEG<sub>6</sub>-Gd, (f) SGQDs-PEG<sub>7</sub>-Gd, and (g) SGQDs-PEG<sub>8</sub>-Gd before and after reacting with H<sub>2</sub>O<sub>2</sub> (10 mmol/L) for 12 h. The fluorescent intensities of SGQDs-PEG<sub>*n*</sub>-Gd (*n* = 2–8) show significant reduction after the reaction with H<sub>2</sub>O<sub>2</sub>. (h) Fluorescence emission spectra of SGQDs-PEG<sub>5</sub>-Gd after reacting with H<sub>2</sub>O<sub>2</sub> (different concentrations) for 12 h. The fluorescent intensity of SGQDs-PEG<sub>5</sub>-Gd decreases with the increase of H<sub>2</sub>O<sub>2</sub> concentration.

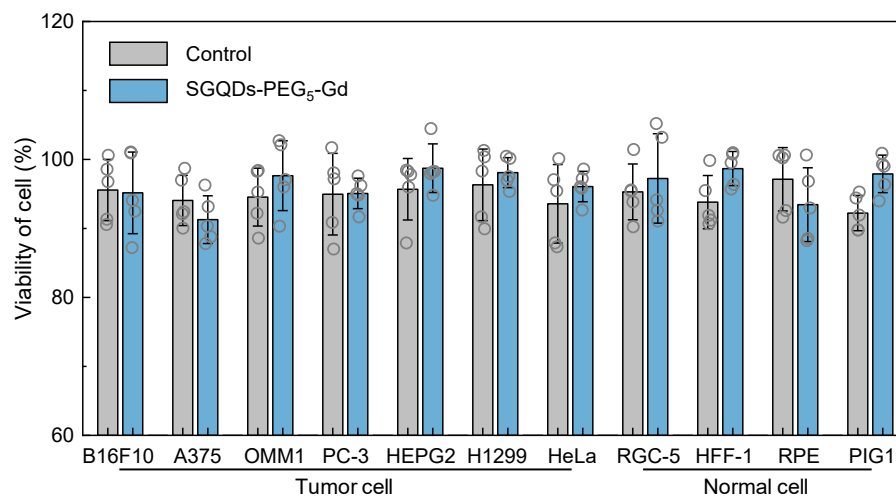

**Fig. S13** Viabilities of various tumor and normal cells after incubation with SGQDs-PEG<sub>5</sub>-Gd (200 µg/mL) for 48 h. Compared to the control group, cells incubated with SGQDs-PEG<sub>5</sub>-Gd show no obvious change in cell survival rate. Error bars indicate the SD of five replicates of the test.
